# Supplementary material for: Finding undiagnosed patients with hepatitis C virus: an application of machine learning to US ambulatory electronic medical records
Source: HighWire-hosted journal article supplement (doi:10.1136/bmjhci-2022-100651), 2023-01-01
Supplement: bmjhci-2022-100651supp001_data_supplement.pdf [file bmjhci-2022-100651supp001_data_supplement.pdf]

1

2 Supplementary Information for “Finding  
3 undiagnosed patients with Hepatitis C  
4 Virus: an application of artificial  
5 intelligence to US ambulatory electronic  
6 medical records”

7

8

9 1 Supplementary Methods

10 Figure S 1 Study design: cross-sectional approach.

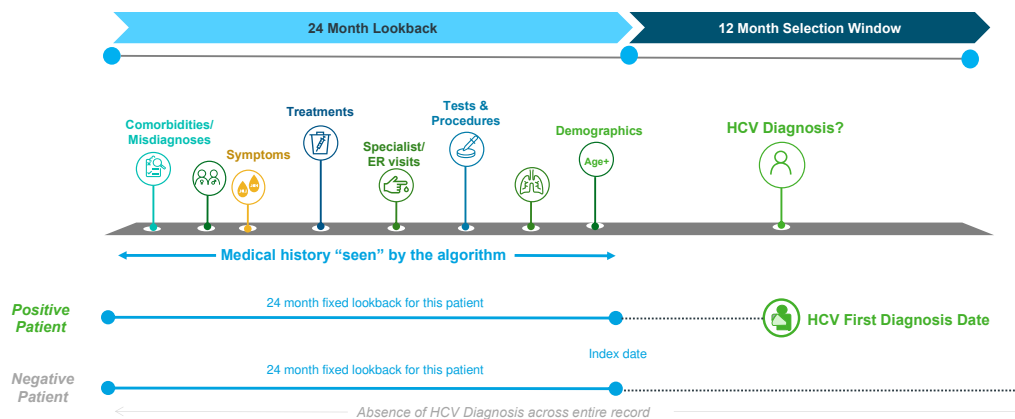

11

12 The study was designed as a retrospective, cross-sectional database study. Patients were assigned to either  
 13 the HCV or non-HCV cohort as described in the main text (see also Figure S1). The diagnosis and product codes  
 14 used to define HCV are listed in Tables S1 and S2. Cross-sections were extracted on a rolling basis with  
 15 between January 2015 and February 2020 with the final cross-section designed to have a non-overlapping  
 16 selection window to facilitate subsequent validation of the model, see Figure S2. The ML algorithm is depicted  
 17 above for a single cross-section. It shows medical history “seen” by the algorithm in the 24 month look back  
 18 for the patient and how the algorithm predicts a HCV diagnosis in the 12 month selection window.

19

20

21 Figure S 2 Rolling cross-sectional study design.

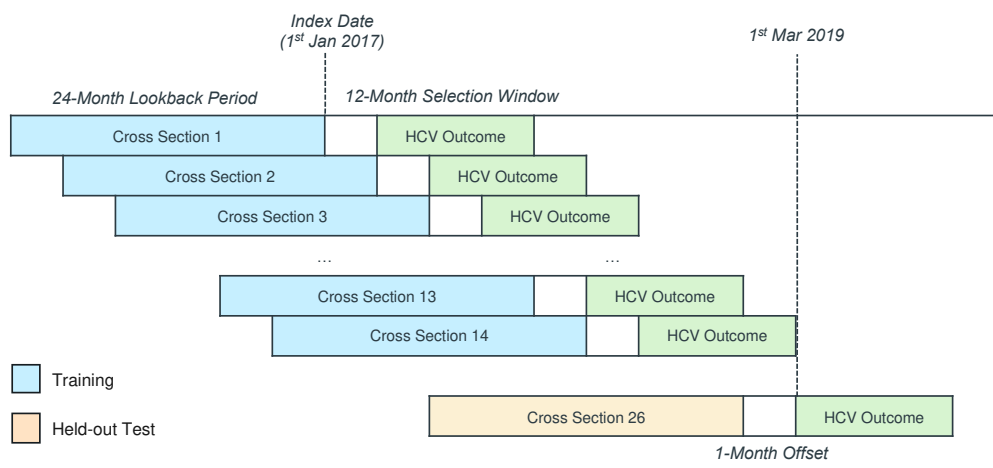

22

23

24

## 25 1.1 Machine Learning Algorithm: Implementation and Validation

26 The GBT algorithm was executed using the XGBoost (xgboost v1.2.1) implementation for Python (3.6.8). The  
27 GBT algorithm was trained using cross-sections 1 to 14 and subsequently tested on cross-section 26, where the  
28 selection window did not overlap with the training cross-section selection windows.

29 The non-HCV cohort was randomly down-sampled to a ratio of 100 non-HCV to HCV patients within each  
30 cross-section. This ratio was chosen to reduce the class imbalance whilst preserving the heterogeneity of the  
31 non-HCV cohort. After down-sampling, a selection criterion that requires each patient to have a predictor in  
32 the lookback period was applied. When assessing the model performance on the test cross-section, the  
33 number of non-HCV patients was rescaled to the ratio seen within the underlying population. This was to  
34 account for the artificially low number of non-HCV patients which would result in an artificially low false  
35 positive rate.

36 Model complexity was optimised by reducing the number of features iteratively. An initial model was trained  
37 on the full predictor space (931 predictors) using the earliest two cross-sections. This model was applied to  
38 cross-section 14, a left out and non-overlapping training cross-section, and performance was reported as  
39 improvement in precision over Universal Screening at recall levels of 5%, 10%, 20%, 50% and 75%. Subsequent  
40 models were retrained iteratively, reducing the predictor space to only the most important predictors as  
41 identified by the total gain, i.e. the contribution of splitting on the predictor to model performance. The model  
42 with the lowest number of predictors without any reduction in performance was chosen.

43 The training of GBT algorithm included hyperparameter tuning for the learning rate, the number of estimators,  
44 max depth, min child weight, and gamma using the grid search method in a cross-validated manner.

45 The final step involved training the GBT algorithm with the optimised hyperparameters on all available training  
46 data followed by its application to the held-out cross-section to assess model performance.

47

48 2 Supplementary Results

49 Figure S3 shows model performance as improvement over Universal Screening versus model complexity (the  
 50 number of model features) at recall levels of 5%, 10%, 20%, 50% and 75%. The 100-predictor model was  
 51 chosen as it reduced complexity whilst retaining model performance.

52 Figure S3 Performance versus complexity (number of predictors).

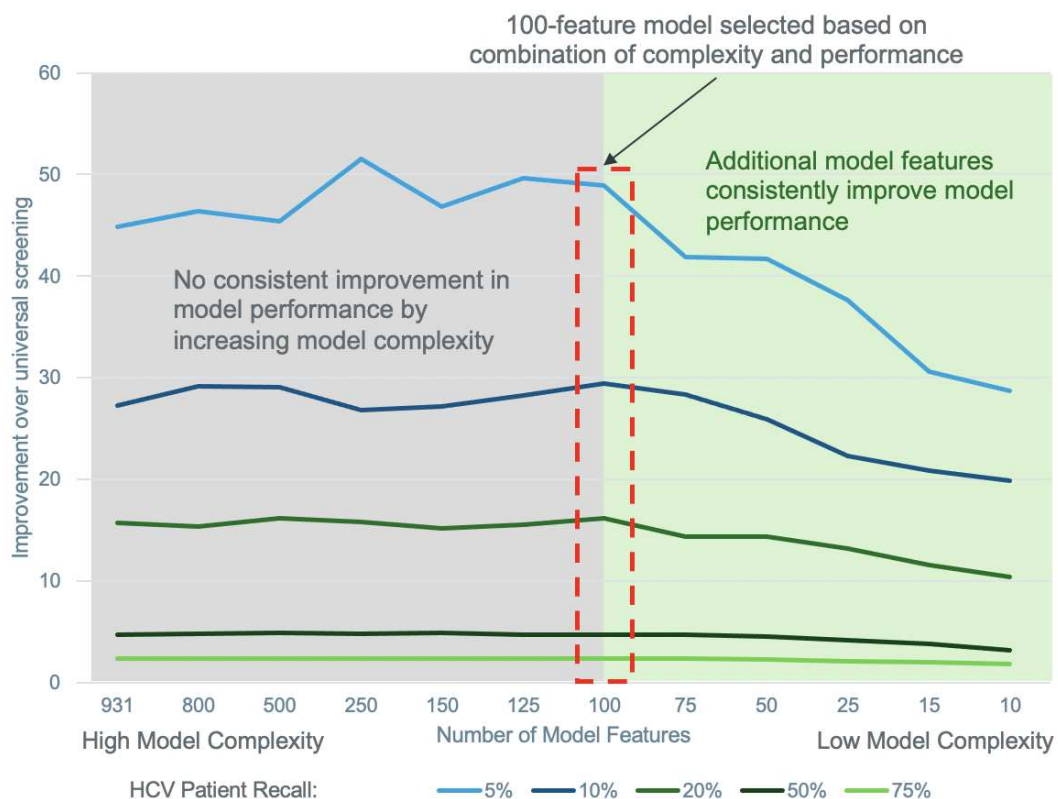

53  
 54  
 55  
 56  
 57  
 58  
 59  
 60  
 61  
 62  
 63

64 Figure S 4 Contribution of age and gender to the HCV risk score where each patient is represented to a single data point.

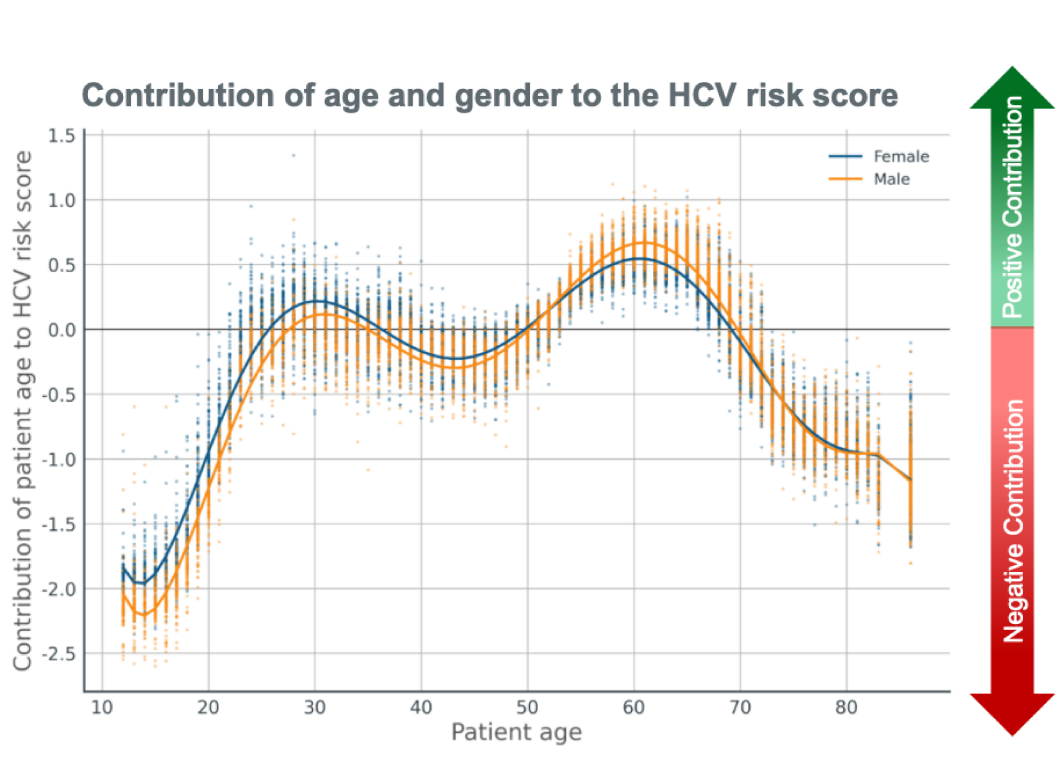

65

66

67 Figure S 5 False Negative Rate per HCV Patient Recall post correction for bias in Age by the protected characteristics; a) Age  
68 b) Gender and c) Race

69

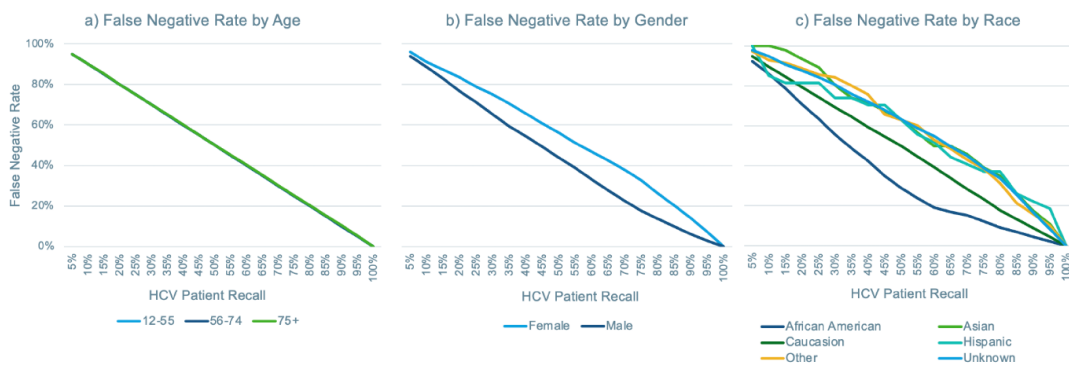

70

71

72

73

74

75 *Figure S 6 False Negative Rate per HCV Patient Recall post correction for bias in Gender by the protected characteristics; a)*  
 76 *Age b) Gender and c) Race*

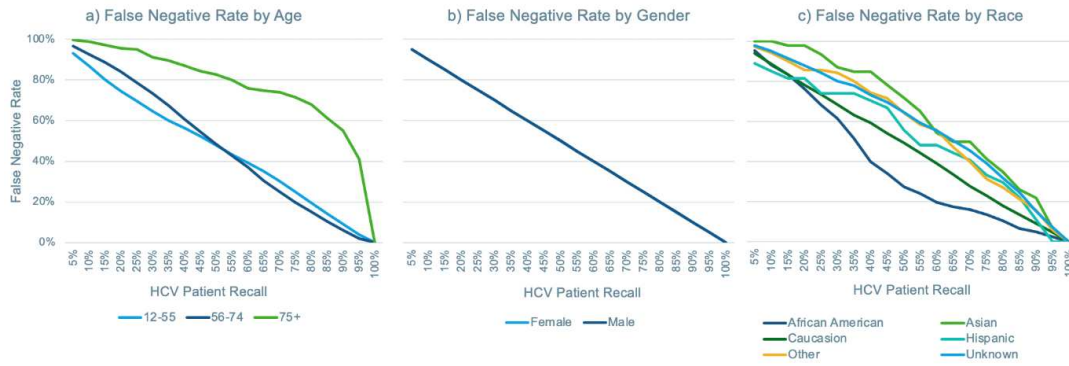

77

78

79

80 *Figure S 7 False Negative Rate per HCV Patient Recall post correction for bias in Race by the protected characteristics; a)*  
 81 *Age b) Gender and c) Race*

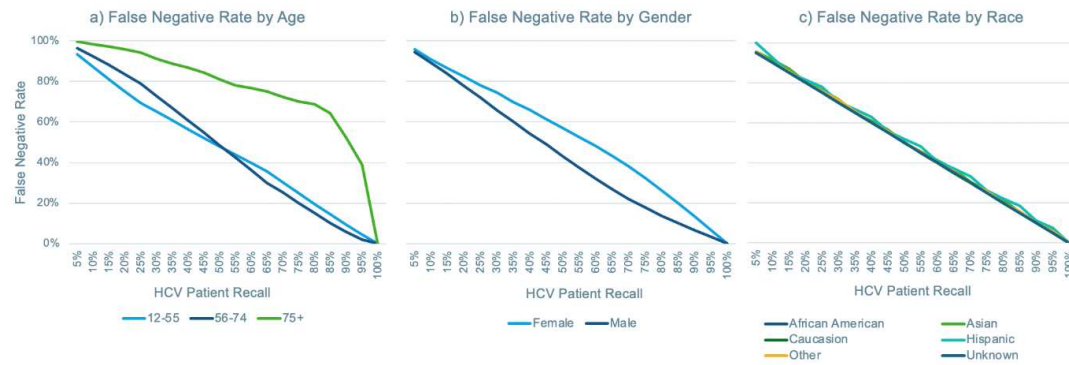

82

83

84

85

## 86 3 Supplementary Tables

## 87 3.1 Diagnosis codes and prescription products for HCV

88 *Table S 1 List of ICD 9 and ICD 10 codes used to select HCV patients.*

| <b>DIAGNOSIS CODE TYPE</b> | <b>DIAGNOSIS CODE</b> | <b>DIAG DESCRIPTION</b>                             |
|----------------------------|-----------------------|-----------------------------------------------------|
| ICD 9                      | 070.41                | ACUTE HEPATITIS C WITH HEPATIC COMA                 |
| ICD 9                      | 070.44                | CHRONIC HEPATITIS C WITH HEPATIC COMA               |
| ICD 9                      | 070.51                | ACUTE HEPATITIS C WITHOUT MENTION OF HEPATIC COMA   |
| ICD 9                      | 070.54                | CHRONIC HEPATITIS C WITHOUT MENTION OF HEPATIC COMA |
| ICD 9                      | 070.7                 | UNSPECIFIED VIRAL HEPATITIS C                       |
| ICD 9                      | 070.70                | UNSPECIFIED VIRAL HEPATITIS C WITHOUT HEPATIC COMA  |
| ICD 9                      | 070.71                | UNSPECIFIED VIRAL HEPATITIS C WITH HEPATIC COMA     |
| ICD 9                      | V02.62                | CARRIER OR SUSPECTED CARRIER OF HEPATITIS C         |
| ICD 10                     | B17.1                 | ACUTE HEPATITIS C                                   |
| ICD 10                     | B17.10                | ACUTE HEPATITIS C WITHOUT HEPATIC COMA              |
| ICD 10                     | B17.11                | ACUTE HEPATITIS C WITH HEPATIC COMA                 |
| ICD 10                     | B18.2                 | CHRONIC VIRAL HEPATITIS C                           |
| ICD 10                     | B19.2                 | UNSPECIFIED VIRAL HEPATITIS C                       |
| ICD 10                     | B19.20                | UNSPECIFIED VIRAL HEPATITIS C WITHOUT HEPATIC COMA  |
| ICD 10                     | B19.21                | UNSPECIFIED VIRAL HEPATITIS C WITH HEPATIC COMA     |
| ICD 10                     | Z22.52                | CARRIER OF VIRAL HEPATITIS C                        |

89

90 *Table S1 List of products used to define treatment for HCV.*

| <b>Generic Product ID (10) DESCRIPTION</b>  | <b>MARKETED PRODUCT NAME</b> |
|---------------------------------------------|------------------------------|
| BOCEPREVIR                                  | VICTRELIS                    |
| DACLATASVIR DIHYDROCHLORIDE                 | DAKLINZA                     |
| ELBASVIR-GRAZOPREVIR                        | ZEPATIER                     |
| GLECAPREVIR-PIBRENTASVIR                    | MAVYRET                      |
| INTERFERON ALFA-2B                          | INTRON A                     |
|                                             | INTRON A W/DILUENT           |
| INTERFERON ALFACON-1                        | INFERGEN                     |
| LEDIPASVIR-SOFOSBUVIR                       | HARVONI                      |
|                                             | LEDIPASVIR/SOFOSBUVIR        |
| OMBITASVIR-PARITAPREVIR-RITONAVIR           | TECHNIVIE                    |
| OMBITASVIR-PARITAPREVIR-RITONAVIR-DASABUVIR | VIEKIRA PAK                  |
|                                             | VIEKIRA XR                   |
| PEGINTERFERON ALFA-2A                       | PEGASYS                      |
|                                             | PEGASYS PROCLICK             |
| PEGINTERFERON ALFA-2B                       | PEG-INTRON                   |
|                                             | PEG-INTRON REDIPEN           |
|                                             | PEG-INTRON REDIPEN PAK 4     |
|                                             | PEGINTRON                    |
| RIBAVIRIN (HEPATITIS C)                     | COPEGUS                      |
|                                             | MODERIBA                     |



|                                     |                         |
|-------------------------------------|-------------------------|
|                                     | MODERIBA 1200 DOSE PACK |
|                                     | MODERIBA 800 DOSE PACK  |
|                                     | REBETOL                 |
|                                     | RIBASPHERE              |
|                                     | RIBASPHERE RIBAPAK      |
|                                     | RIBATAB                 |
|                                     | RIBAVIRIN               |
| SIMEPREVIR SODIUM                   | OLYSIO                  |
| SOFOSBUVIR                          | SOVALDI                 |
| SOFOSBUVIR-VELPATASVIR              | EPCLUSA                 |
|                                     | SOFOSBUVIR/VELPATASVIR  |
| SOFOSBUVIR-VELPATASVIR-VOXILAPREVIR | VOSEVI                  |
| TELAPREVIR                          | INCIVEK                 |

91

## 92 3.2 List of predictors concepts

93 *Table S2 List of predictors used for creating features for the ML algorithm.*

|                           |
|---------------------------|
| <b>PREDICTOR CONCEPTS</b> |
| AGE                       |
| GENDER                    |
| RACE                      |
| ABDOMINAL CT SCAN         |
| ABDOMINAL SURGERIES       |

|                                    |
|------------------------------------|
| ABNORMAL STOOL COLOR               |
| ABNORMAL WGT LOSS                  |
| ACL INHIBITORS                     |
| ADDICTION MEDICINE SPECIALTY VISIT |
| ALCOHOL USE ABUSE DEPENDENCE       |
| ALCOHOL WITHDRAWAL                 |
| ALCOHOLIC LIVER DISEASE            |
| ALOPECIA AREATA                    |
| ALPHA 1 ANTITRYPSIN DEFICIENCY     |
| AMBULATORY SPECIALTY VISIT         |
| AMEBICIDES                         |
| AMINOGLYCOSIDES                    |
| ANALGESICS                         |
| ANOREXIA                           |
| ANTHELMINTICS                      |
| ANTI INFECTIVE AGENTS              |
| ANTI INFLAMMATORY ANALGESICS       |
| ANTI MOTILITY DRUGS                |
| ANTI REJECTION AGENTS              |
| ANTI ANXIETY AGENTS                |
| ANTIDEPRESSANTS                    |
| ANTIDIARRHEAL PROBIOTIC AGENTS     |

|                                   |
|-----------------------------------|
| ANTIEMETICS                       |
| ANTIFUNGALS                       |
| ANTIHYPERTENSIVES COMBOS          |
| ANTIHYPERTENSIVES MISC            |
| ANTIMALARIALS                     |
| ANTIMYOBACTERIAL AGENTS           |
| ANTIPHOSPHOLIPID SYNDROME         |
| ANTIPSYCHOTICS ANTIMANIC AGENTS   |
| ANTIRETROVIRALS                   |
| ANTIULCERANTS                     |
| ANTIULCERANTS PPIS                |
| ANXIETY                           |
| ARTERITIS                         |
| ARTHROPOD BORNE HEMORRHAGIC FEVER |
| ASCITES                           |
| AUTOIMMUNE HEMOLYTIC ANEMIA       |
| B-CELL NON HODGKINS LYMPHOMA      |
| BACTEREMIA                        |
| BARIATRIC SPECIALTY VISIT         |
| BEHAVIORAL HEALTH SPECIALTY VISIT |
| BENIGN NEOPLASM                   |
| BILE ACID SEQUESTRANTS            |

|                                        |
|----------------------------------------|
| BMT SCT TRANSPLANT                     |
| BRUISING                               |
| CACHEXIA                               |
| CARDIOPULMONARY BYPASS                 |
| CELIAC DISEASE                         |
| CEPHALOSPORINS                         |
| CHEST PAIN                             |
| CHLAMYDIA                              |
| CHOLANGITIS                            |
| CHOLESTEROL ABSORPTION INHIBITORS      |
| CHOLESTEROL AGENTS                     |
| CHRONIC FATIGUE                        |
| CHRONIC LIVER DISEASE                  |
| CHRONIC LUNG DISEASE                   |
| CHURG STRAUSS SYNDROME                 |
| CIRRHOSIS                              |
| CKD ESRD                               |
| CLINICAL SOCIAL WORKER SPECIALTY VISIT |
| COLITIS                                |
| COLON CANCER SCREENING                 |
| COLONOSCOPY                            |
| COMPLETE BLOOD COUNT                   |

|                                    |
|------------------------------------|
| CONFUSION                          |
| CONVULSIONS                        |
| COUNSELOR SPECIALTY VISIT          |
| CRITICAL CARE SPECIALTY VISIT      |
| CRYOGLOBULINEMIA                   |
| CYTOMEGALOVIRUS                    |
| DARK URINE                         |
| DEPRESSION                         |
| DIABETES                           |
| DIAGNOSTIC TESTING SPECIALTY VISIT |
| DIARRHEA                           |
| DIURETICS                          |
| DROWSINESS                         |
| DRUG SUBSTANCE WITHDRAWAL          |
| DRY EYES                           |
| DYSARTHRIA                         |
| DYSMENORRHEA                       |
| DYSPEPSIA                          |
| DYSPNEA                            |
| EARLY SATIETY                      |
| EDEMA                              |
| EMERGENCY MEDICINE SPECIALTY VISIT |

|                                            |
|--------------------------------------------|
| ENTERITIS DUE TO UNSPECIFIED VIRUS         |
| EPIDEMIOLOGY PUBLIC HEALTH SPECIALTY VISIT |
| ERYTHROPOIESIS STIMULATING AGENTS ESAS     |
| FAMILIAL HCV                               |
| FAMILY PRACTICE SPECIALTY VISIT            |
| FEVER                                      |
| FIBRATES                                   |
| FIBROMYALGIA                               |
| FLU VACCINES                               |
| FLUOROQUINOLONES                           |
| GASTROENTEROLOGY SPECIALTY VISIT           |
| GENERAL PRACTICE SPECIALTY VISIT           |
| GENERAL SURGERY SPECIALTY VISIT            |
| GENETICS SPECIALTY VISIT                   |
| GERD                                       |
| GERIATRIC MEDICINE SPECIALTY VISIT         |
| GLOMERULONEPHRITIS                         |
| GONORRHOEAE                                |
| GRANULOMATOSIS WITH POLYANGIITS            |
| HCV TESTS                                  |
| HEADACHE                                   |
| HEART PALPITATIONS                         |

|                                        |
|----------------------------------------|
| HEARTBURN                              |
| HEMATOLOGY SPECIALTY VISIT             |
| HEMATURIA PROTEINURIA URINALYSIS       |
| HEMOCHROMATOSIS                        |
| HEMODIALYSIS                           |
| HEMODIALYSIS TREATMENT                 |
| HEMOPHILIA                             |
| HEMORRHOIDS                            |
| HEPATIC CARCINOMA                      |
| HEPATIC ENCEPHALOPATHY                 |
| HEPATIC FIBROSIS                       |
| HEPATIC OSTEODYSTROPHY                 |
| HEPATITIS CO INFECTION                 |
| HEPATITIS VACCINES                     |
| HEPATOLOGY SPECIALTY VISIT             |
| HEPATOMEGALY SPLENOMEGALY              |
| HERPES SIMPLEX VIRUS                   |
| HIGH RISK SEXUAL BEHAVIOR              |
| HISTORY OF CARDIOPULMONARY BYPASS CABG |
| HIV AIDS                               |
| HOMELESSNESS ECONOMIC BURDEN           |
| HUMAN PAPILLOMAVIRUS                   |

|                                    |
|------------------------------------|
| HYPERGLYCEMIA                      |
| HYPERLIPIDEMIA                     |
| HYPERTENSION                       |
| HYPERTHYROIDISM                    |
| HYPOGLYCEMIA                       |
| HYPOTHYROIDISM                     |
| IBS                                |
| IMMUNE THROMBOCYTOPENIC PURPURA    |
| IMMUNOLOGY SPECIALTY VISIT         |
| IMMUNOSUPPRESSIVES                 |
| INCARCERATION HISTORY              |
| INFECTIOUS DISEASE SPECIALTY VISIT |
| INFECTIOUS MONONUCLEOSIS           |
| INFLUENZA                          |
| INJECTABLE IRON                    |
| INSOMNIA                           |
| INSULIN RESISTANCE                 |
| INTERNAL MEDICINE SPECIALTY VISIT  |
| IPF                                |
| JAUNDICE                           |
| JOINT PAIN                         |
| JUGULAR VEIN DISTENTION            |



|                                   |
|-----------------------------------|
| LAB RESULT – ALT                  |
| LAB RESULT – AST                  |
| LAB RESULT – BILIRUBIN            |
| LACTOSE INTOLERANCE               |
| LICHEN PLANUS                     |
| LIVER ABSCESS                     |
| LIVER BIOPSY                      |
| LIVER DISEASE MULTIANALYTE ASSAYS |
| LIVER ELASTOGRAPHY                |
| LIVER FAILURE                     |
| LIVER FUNCTION STUDIES            |
| LOWER RESP TRACT INFECTION        |
| LUPUS                             |
| LYMPHADENOPATHY                   |
| MACROLIDES                        |
| MAMMOGRAPHY                       |
| MICROSCOPIC POLYANGIITS           |
| MILITARY SERVICE                  |
| MISC ANTI-INFECTIVE AGENTS        |
| MOORENS CORNEAL ULCERS            |
| MOSQUITO BORNE VIRAL ENCEPHALITIS |
| MTP INHIBITORS                    |

|                                       |
|---------------------------------------|
| MYALGIAS                              |
| NAUSEA VOMITING                       |
| NECROLYTIC ACRAL ERYTHEMA             |
| NEUROPATHY                            |
| NICOTINIC ACID DERIVATIVES            |
| NON-ALCOHOLIC STEATOHEPATITIS NASH    |
| NON-HODGKIN LYMPHOMA                  |
| NON-INFECTIOUS HEPATITIS              |
| NONNARCOTIC ANALGESICS                |
| NURSE PRACTITIONER SPECIALTY VISIT    |
| OBESITY                               |
| OBSTETRICS GYNECOLOGY SPECIALTY VISIT |
| OCCUPATIONAL EXPOSURE                 |
| OPIOID ANALGESICS                     |
| ORGAN TRANSPLANT                      |
| OSTEOARTHRITIS                        |
| OTHER ABDOMINAL PAIN                  |
| OTHER ANTIVIRALS                      |
| OTHER DRUG USE ABUSE                  |
| OTHER FATIGUE                         |
| OTHER HEADACHE SYNDROMES              |
| OTHER HEMORRHAGIC CONDITIONS          |

|                                     |
|-------------------------------------|
| OTHER MALAISE                       |
| OTHER POXVIRUS INFECTIONS           |
| OTHER PURPURA                       |
| OTHER STI                           |
| OTHER VASCULITIS                    |
| PCSK9 INHIBITORS                    |
| PENICILLINS                         |
| PEPTIC ULCER DISEASE                |
| PHYSICIAN ASSISTANT SPECIALTY VISIT |
| POLYMYOSITIS DERMATOMYOSITIS        |
| PORPHYRIA CUTANEA TARDA             |
| PORTAL HYPERTENSION                 |
| PPIS                                |
| PROSTATE CANCER                     |
| PRURITUS                            |
| PSORIASIS                           |
| PSYCHIATRY SPECIALTY VISIT          |
| PULMONOLOGY SPECIALTY VISIT         |
| RAPE                                |
| RASH                                |
| RAYNAUDS PHENOMENON                 |
| REACTIVE ARTHRITIS                  |

|                                           |
|-------------------------------------------|
| REGISTERED NURSE SPECIALTY VISIT          |
| RENAL CANCER                              |
| RHEUMATOID ARTHRITIS                      |
| RHEUMATOID VASCULITIS                     |
| RIGHT SIDED HF                            |
| RIGHT UPPER ABDOMINAL PAIN                |
| RISK OF INTRAVENOUS DRUG USE ABUSE        |
| SCLERITIS                                 |
| SCLERODERMA                               |
| SEDATIVES HYPNOTICS SLEEP DISORDER AGENTS |
| SENSORY NEUROPATHY                        |
| SJOGRENS DISEASE                          |
| SKIN ABCESS                               |
| SLOW VIRUS INFECTIONS                     |
| SLURRED SPEECH                            |
| SPIDER ANGIOMAS NEVUS                     |
| SPLENOMEGALY                              |
| STATINS                                   |
| STD TESTS                                 |
| STEATORRHEA                               |
| STEATOSIS                                 |
| STREPTOCOCCUS PNEUMONIAE                  |

|                                   |
|-----------------------------------|
| SUBSTANCE USE ABUSE DEPENDENCE    |
| SUBSTANCE USE DISORDER AGENTS     |
| SULFONAMIDES                      |
| SWELLING OF LIMB                  |
| SYPHILIS                          |
| TETRACYCLINES                     |
| THALASSEMIA                       |
| THROMBOCYTOPENIA                  |
| THROMBOSIS                        |
| THYROIDITIS                       |
| TRANSEXUALISM                     |
| TRANSFUSIONS                      |
| TRANSVESTIC FETISHISM             |
| TRICHOMONIASIS                    |
| ULCER THERAPY COMBOS              |
| UNDERWEIGHT                       |
| UPPER ENDOSCOPY                   |
| UPPER RESPIRATORY TRACT INFECTION |
| URINARY RETENTION                 |
| UVEITIS                           |
| VACCINES (HEPATITIS or INFLUENZA) |
| VARICES                           |

|                             |
|-----------------------------|
| VIRAL CHLAMYDIAL INFECTIONS |
| VIRAL HEPATITIS             |
| VIRAL PNEUMONIA             |
| VITAMIN D DEFICIENCY        |
| VITILIGO                    |
| WEAKNESS                    |
| XANTHELASMA XANTHOMA        |

94

95
